# Supplementary material for: The impact of LR-HSQMBC very long-range heteronuclear correlation data on computer-assisted structure elucidation
Source: Royal Society of Chemistry journal article supplement (doi:10.1039/c4ob01418a), 2014-09-16

# The Impact of LR-HSQMBC Very Long-Range Heteronuclear Correlation Data on Computer-Assisted Structure Elucidation

## SUPPLEMENTAL INFORMATION

K. A. Blinov<sup>a</sup>, A. V. Buevich<sup>b</sup>, R. T. Williamson<sup>c</sup>, and G. E. Martin<sup>c</sup>

<sup>a</sup> Molecule Apps, LLC, Wilmington, DE 19808.

<sup>b</sup> Merck Research Laboratories, Process & Analytical Chemistry, NMR Structure Elucidation, Kenilworth, NJ 07033.

<sup>c</sup> Merck Research Laboratories, Process & Analytical Chemistry, NMR Structure Elucidation, Rahway, NJ 07065.

-----

- S1. Molecular connectivity diagram from Figure 1. Pg . 2.
- S2. Structure Elucidator CASE program output when the cervinomycin A<sub>2</sub> calculation was done using HMBC and 4 Hz LR-HSQMBC data. Only 4 structure were generated in a calculation lasting 37 h. Pg 3.
- S3. Long-range heteronuclear correlations observed in the 2 Hz optimized LR-HSQMBC spectrum of staurosporine (**2**). Correlations are color-coded as a function of the correlation path length. Pg. 4.
- S4. Structure Elucidator CASE program output when the staurosporine calculation was done using <sup>1</sup>H-<sup>13</sup>C and <sup>1</sup>H-<sup>15</sup>N HMBC data, IDR-HSQC-TOCSY, 2 Hz optimized LR-HSQMBC, 1,1-ADEQUATE, and dual optimized inverted <sup>1</sup>J<sub>CC</sub> 1,n-ADEQUATE data. The calculation lasted 0.2 s and generated 24 structures. Pg. 5.

S1. Molecular connectivity diagram from Figure 1.

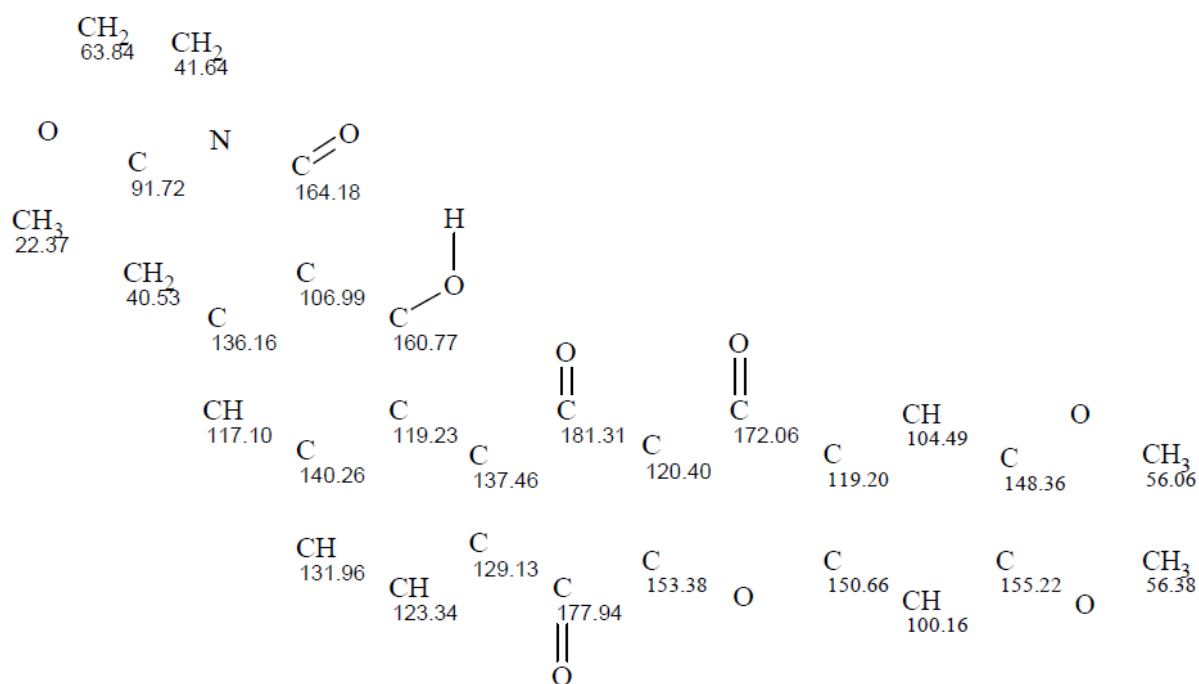

The complete ensemble of long-range heteronuclear correlations in the 4 Hz HMBC and 4 and 2 Hz optimized LR-HSQMBC of cervinomycin A<sub>2</sub> are shown in: R. T. Williamson, A. V. Buevich, G. E. Martin, T. Parella, *J. Org. Chem.*, **2014**, *79*, 3387.

S2. Structure Elucidator CASE program output when the cervinomycin A<sub>2</sub> calculation was done using 8 and 4 Hz optimized <sup>1</sup>H-<sup>13</sup>C HMBC and 4 Hz optimized LR-HSQMBC data. A total of 4 structures were generated in a 37 h calculation (shown below). Structures are rank ordered based on congruence between calculated and experimental <sup>13</sup>C chemical shifts. When the 2 Hz optimized LR-HSQMBC data were substituted for the 4 Hz optimized LR-HSQMBC data in the program input, 7 structures were generated by the program in 150 s. When both 4 and 2 Hz optimized LR-HSQMBC data were included in the program input file, only a single structure was generated in a 104 s calculation.

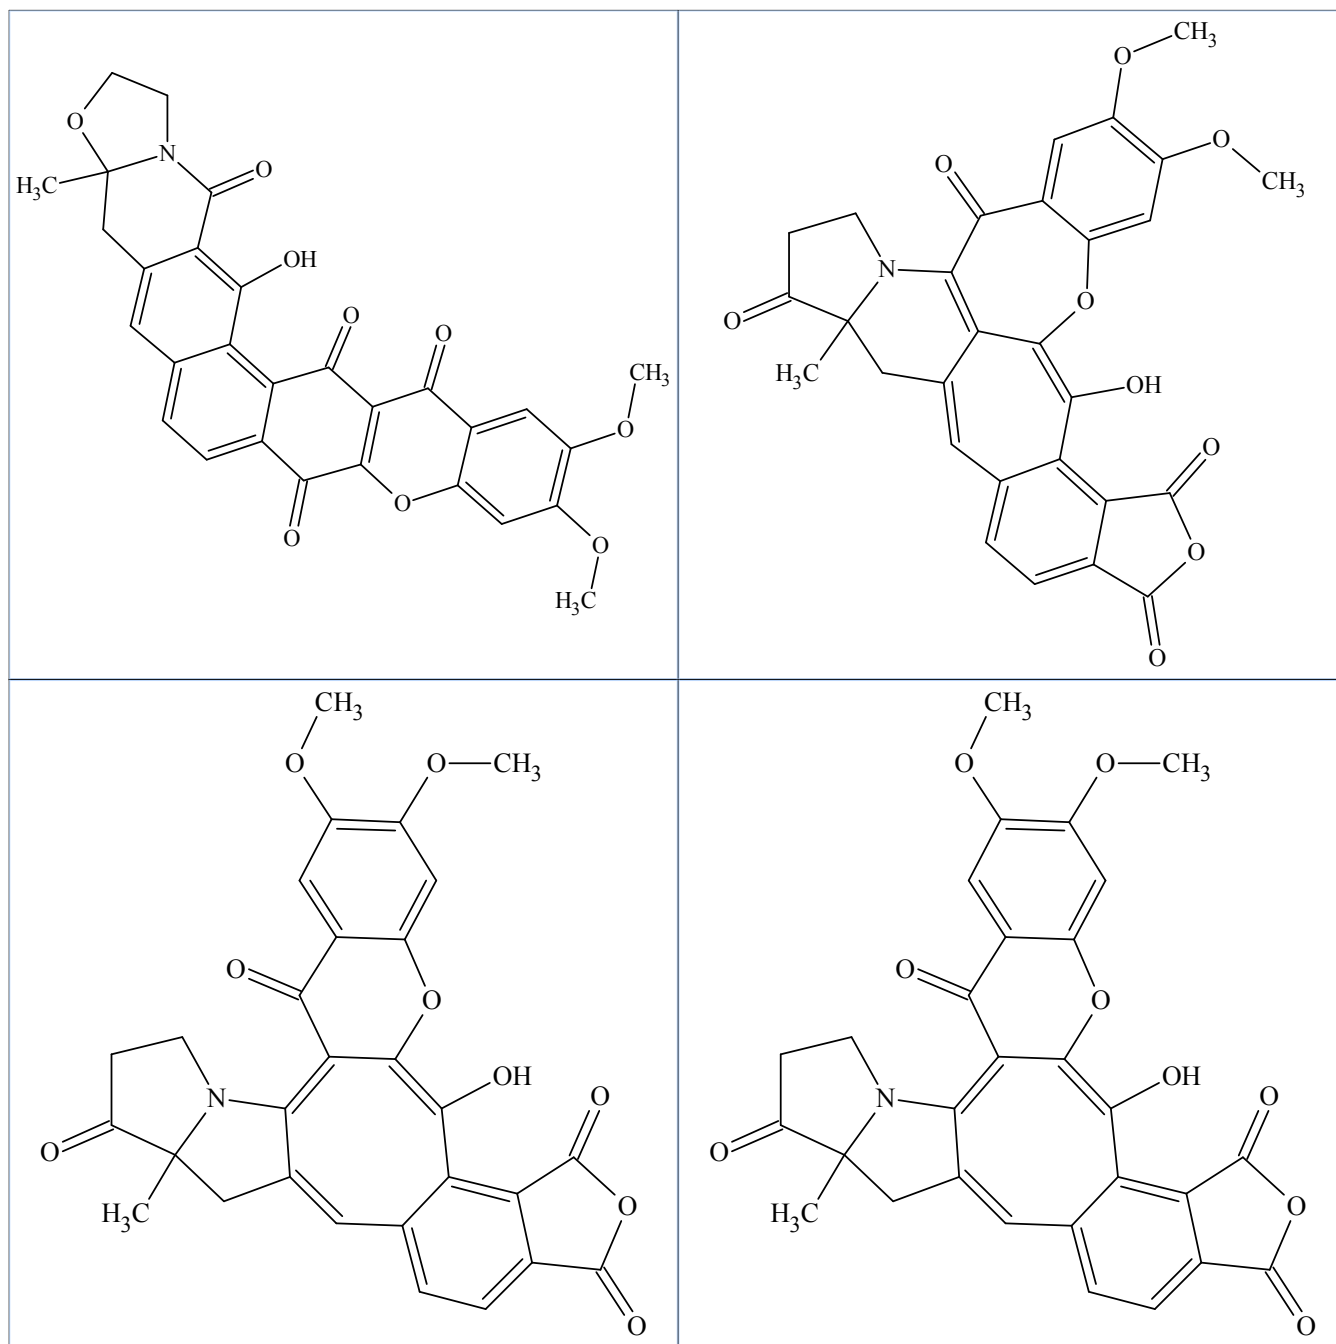

S3. Long-range heteronuclear correlations observed in the 2 Hz optimized LR-HSQMBC spectrum of staurosporine (**2**). Correlations are color-coded as a function of the correlation path length. When more than one coupling path was possible, the shorter pathlength is indicated.

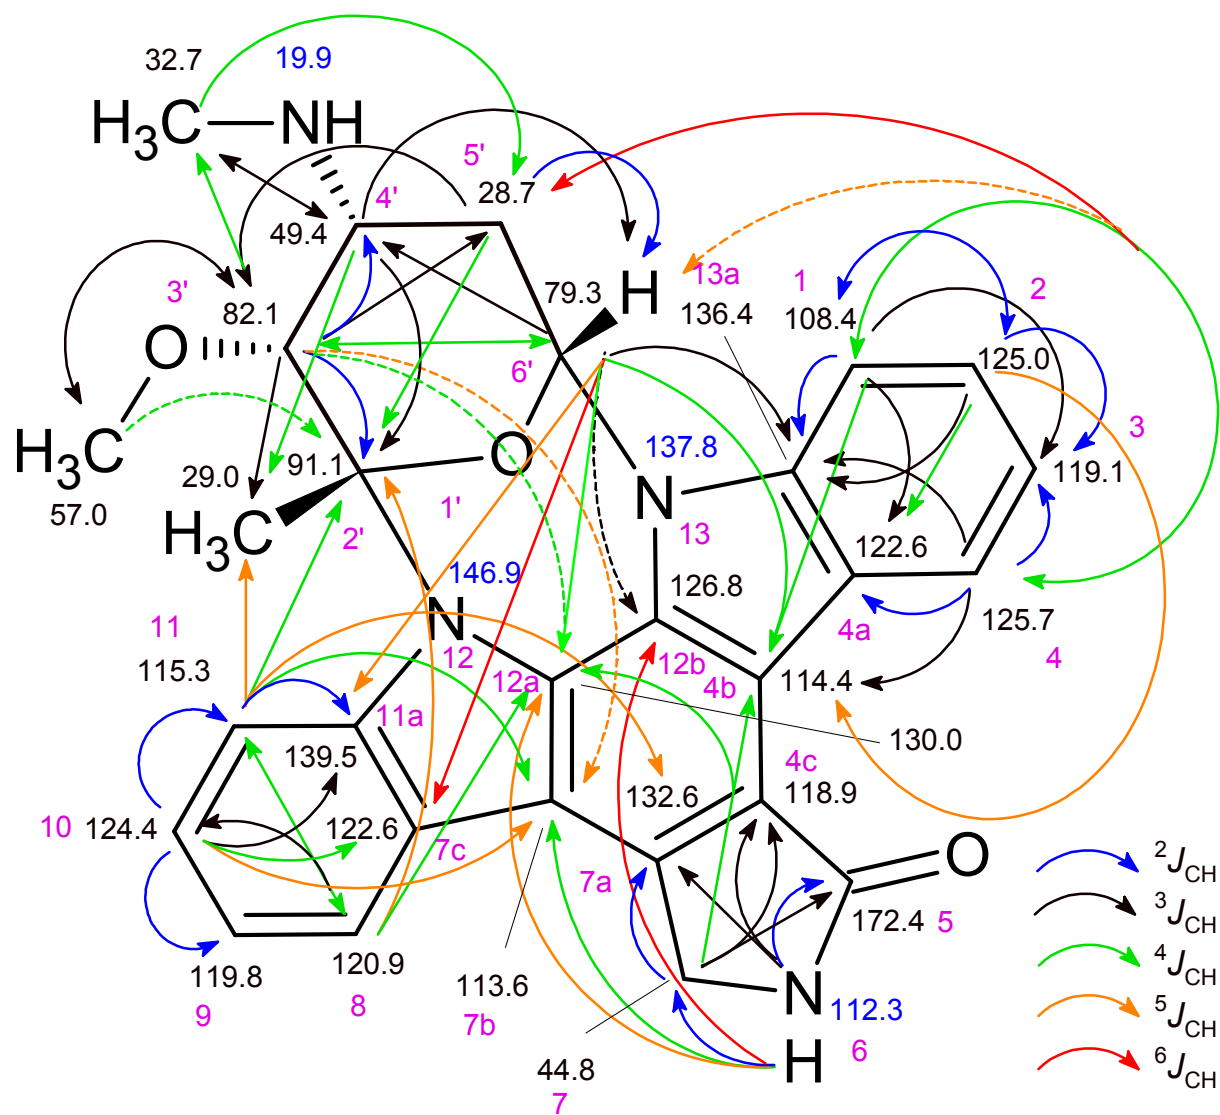

$^1\text{H}$ - $^{13}\text{C}$  and  $^1\text{H}$ - $^{15}\text{N}$  HMBC, 1,1-ADEQUATE, and dual optimized inverted  $^1J_{\text{CC}}$  correlations for staurosporine (**2**) were previously reported (see: M. M. Senior, R. T. Williamson, and G. E. Martin, *J. Nat. Prod.*, **2013**, 76, 2088).

**S4.** Structure Elucidator CASE program output when the staurosporine calculation was done using  $^1\text{H}$ - $^{13}\text{C}$  and  $^1\text{H}$ - $^{15}\text{N}$  HMBC data, IDR-HSQC-TOCSY, 2 Hz optimized LR-HSQMBC, 1,1-ADEQUATE, and dual optimized inverted  $^1J_{\text{CC}}$  1,n-ADEQUATE data. The calculation lasted 0.2 s and generated 24 structures. Structures are rank ordered based on congruence between calculated and experimental  $^{13}\text{C}$  chemical shifts.

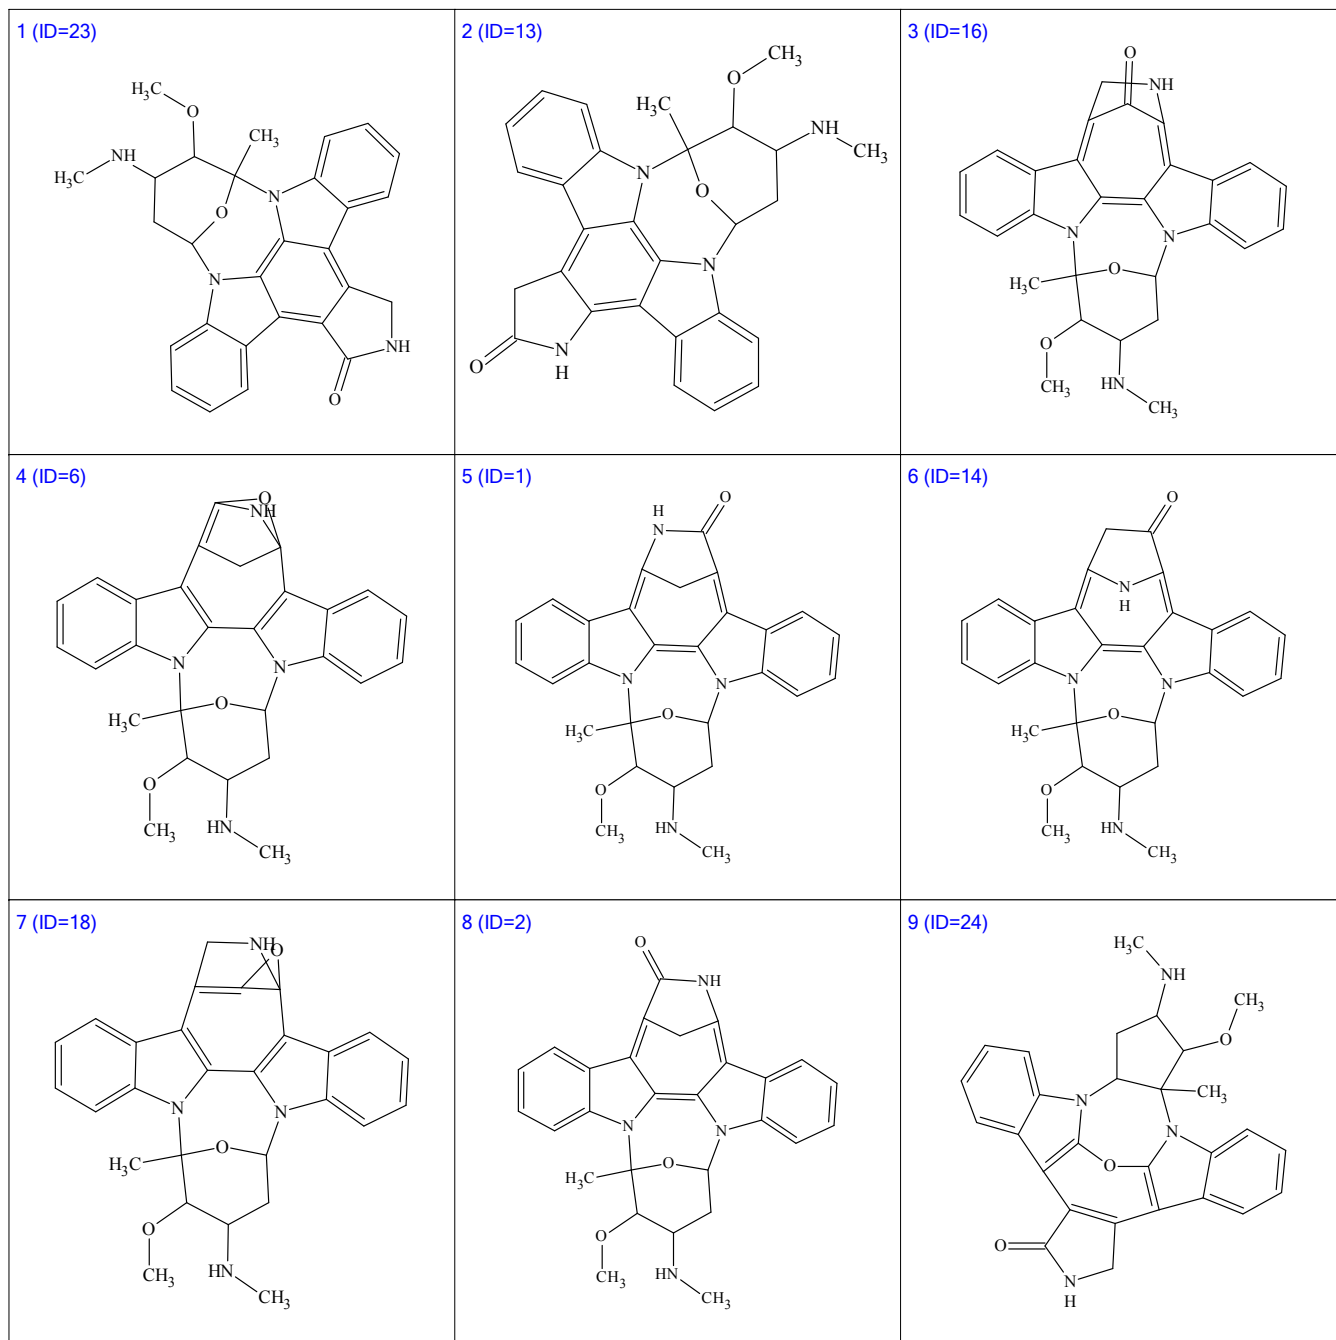

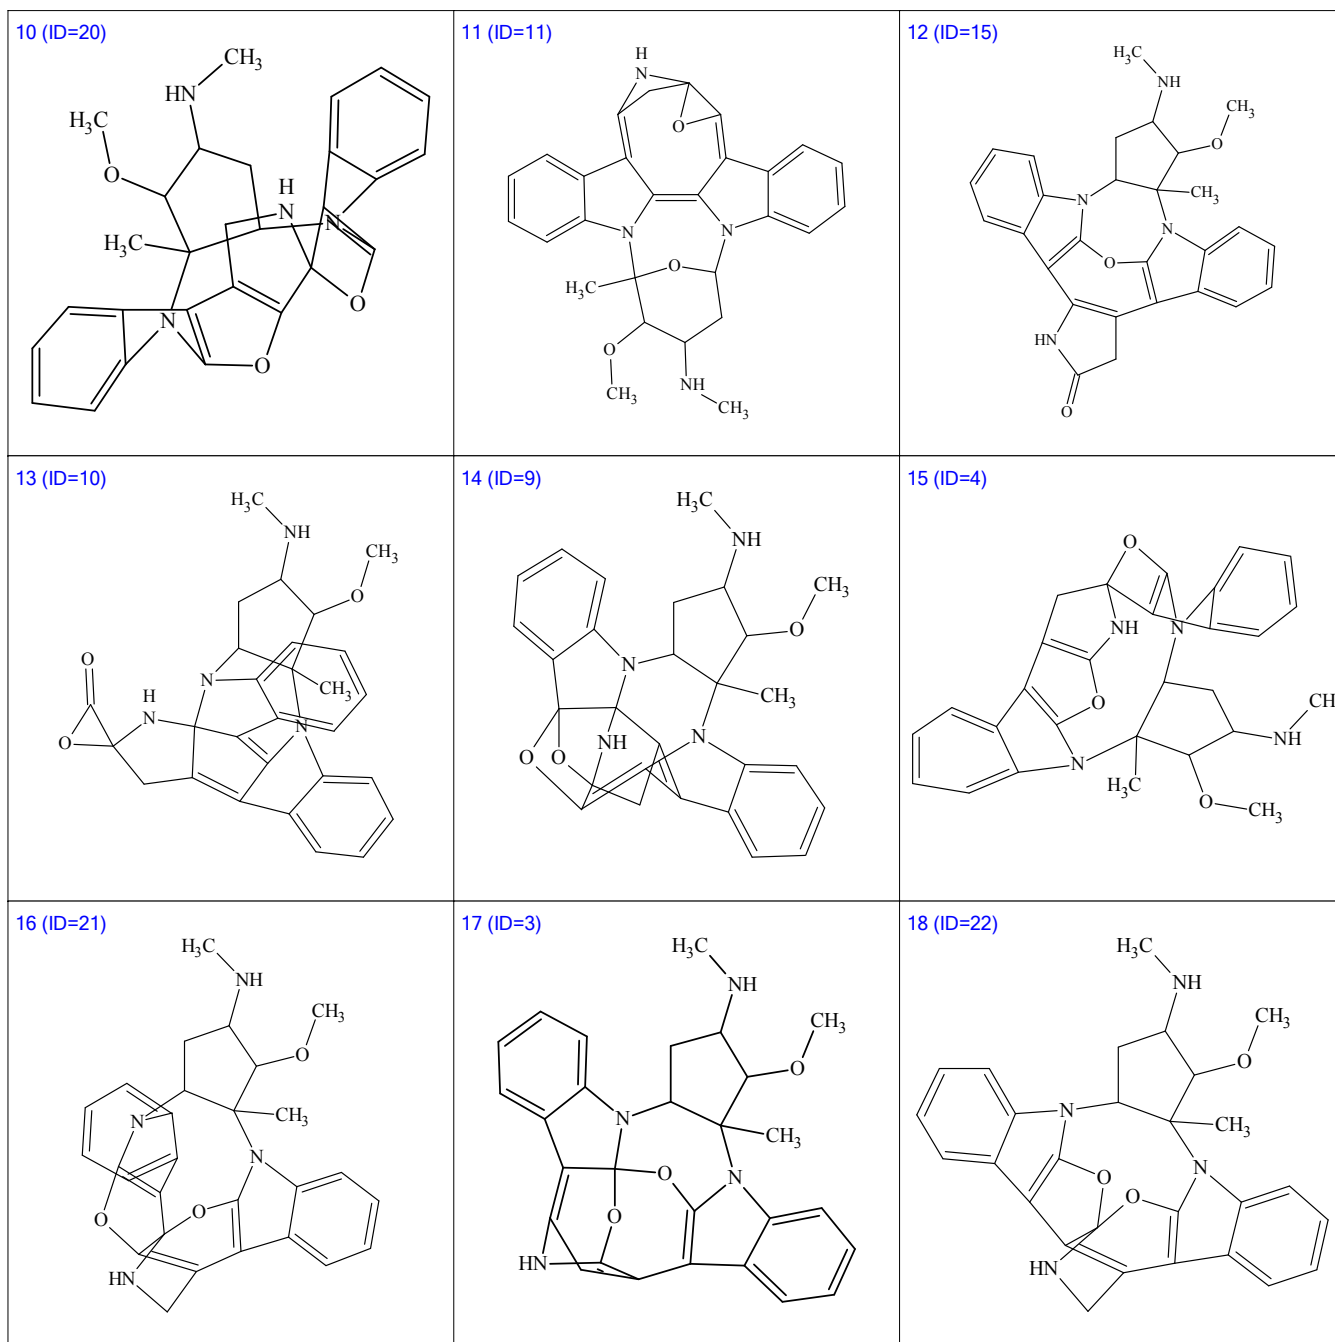

19 (ID=8)

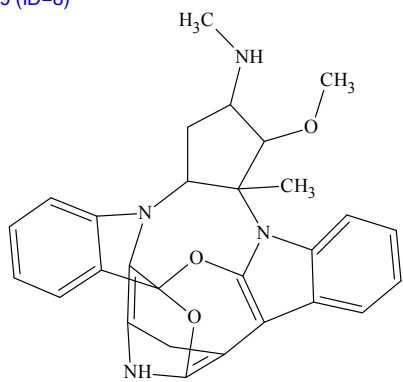

20 (ID=19)

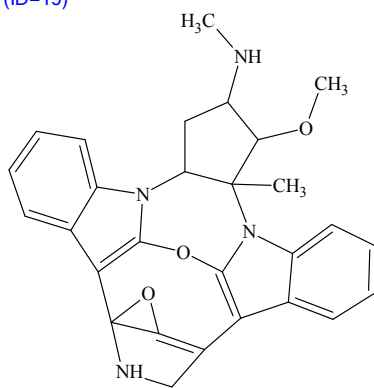

21 (ID=17)

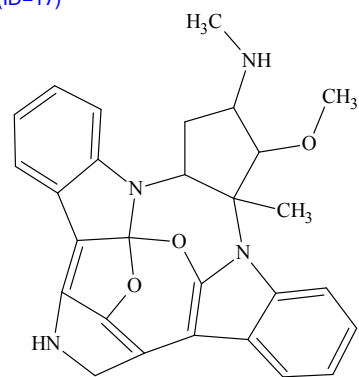

22 (ID=7)

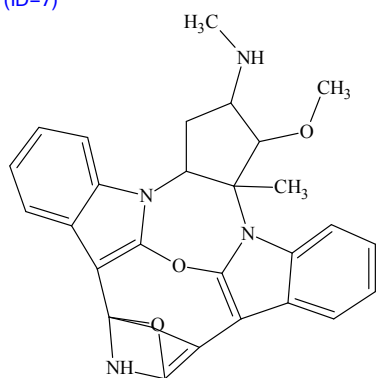

23 (ID=12)

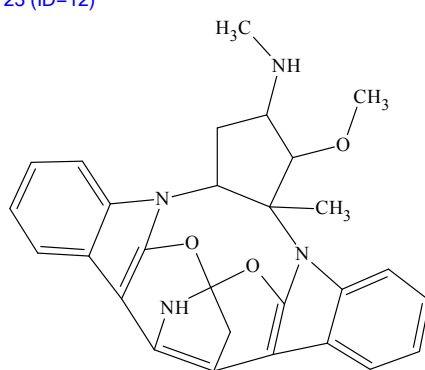

24 (ID=5)

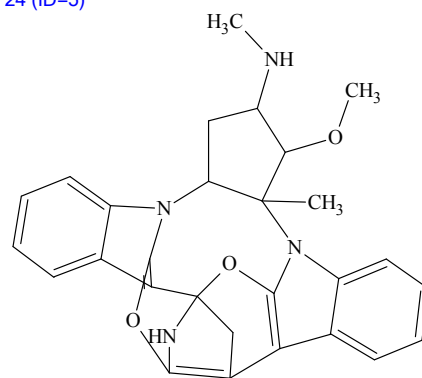

Supplement: c4ob01418a1.pdf [file c4ob01418a1.pdf]
